# Supplementary material for: Pre-diagnostic metabolite concentrations and prostate cancer risk in 1077 cases and 1077 matched controls in the European Prospective Investigation into Cancer and Nutrition
Source: Springer Nature journal article supplement (doi:10.1186/s12916-017-0885-6), 2017-06-23
Supplement: MOESM2 [file 13274934]

## ADDITIONAL FILE 2

### SUPPLEMENTARY FIGURES

**A**

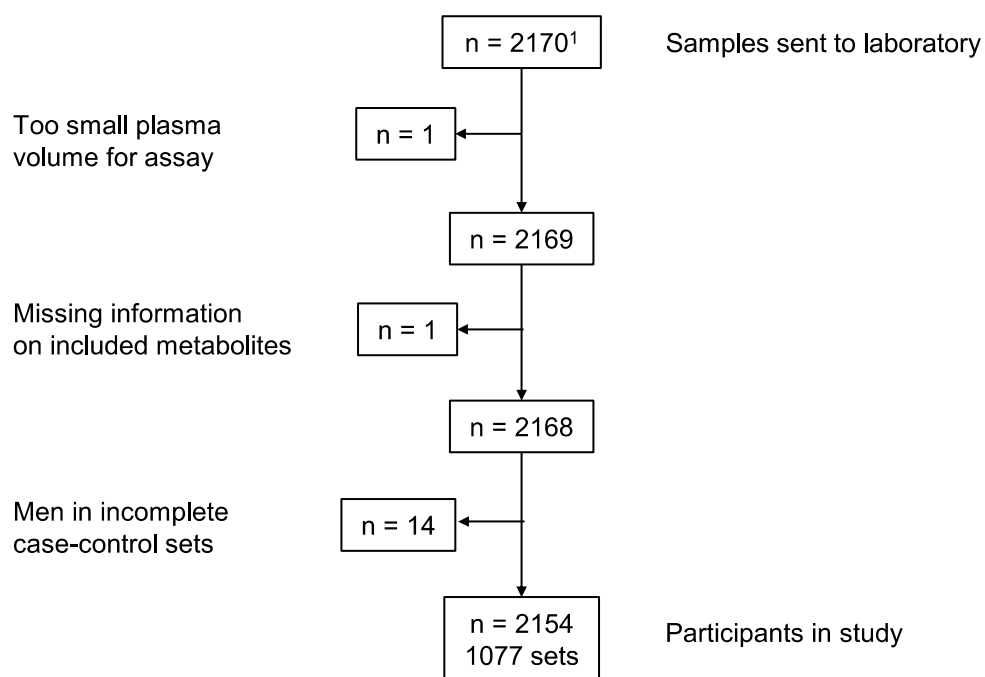

**B**

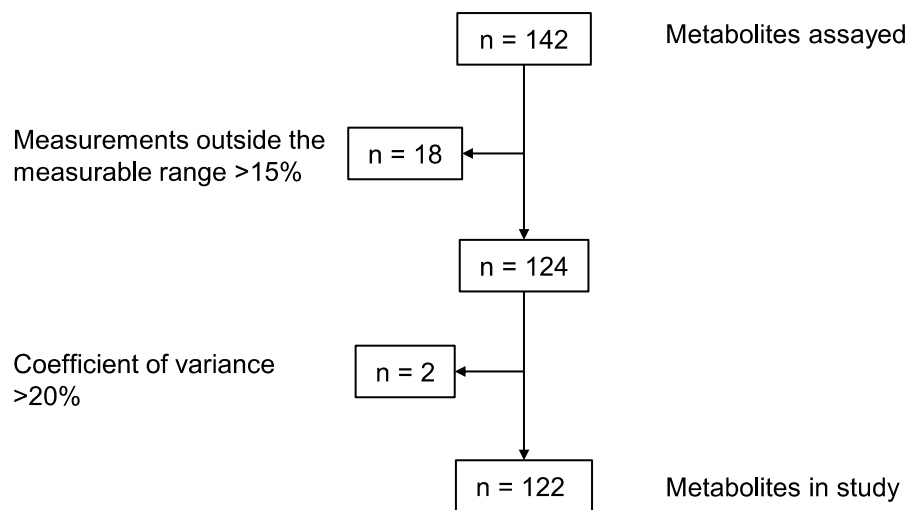

**Figure S1. Flowchart of exclusions of A: participants and B: metabolites.**

<sup>1</sup>There were 2162 samples but 8 samples contributed to the data set twice because three controls became cases and five controls were controls for two cases each.

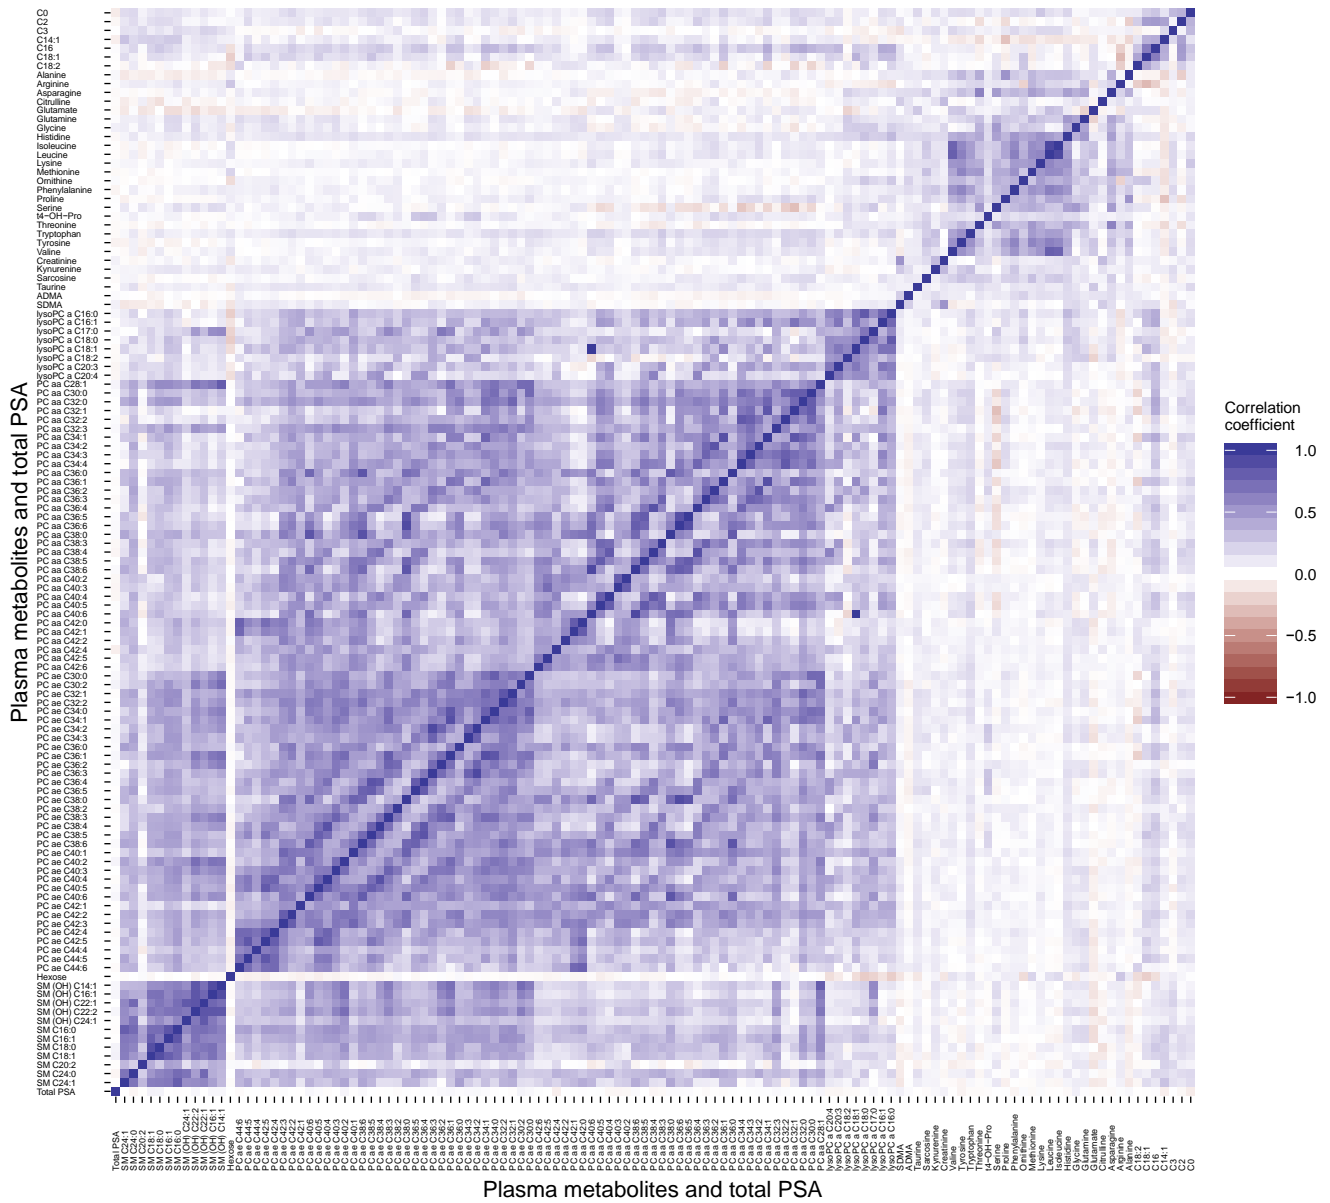

**Figure S2. Partial correlation coefficients between metabolite and total PSA concentrations at baseline.** Correlations between total PSA and metabolites were based on 764 controls for which total PSA was available, while correlations between metabolites included 1077 controls. The analyses were based on log-transformed data and were adjusted for age at blood collection (<55; 55-59; 60-64; 65-69; ≥70 years), body mass index (fourths; unknown) and study centre.

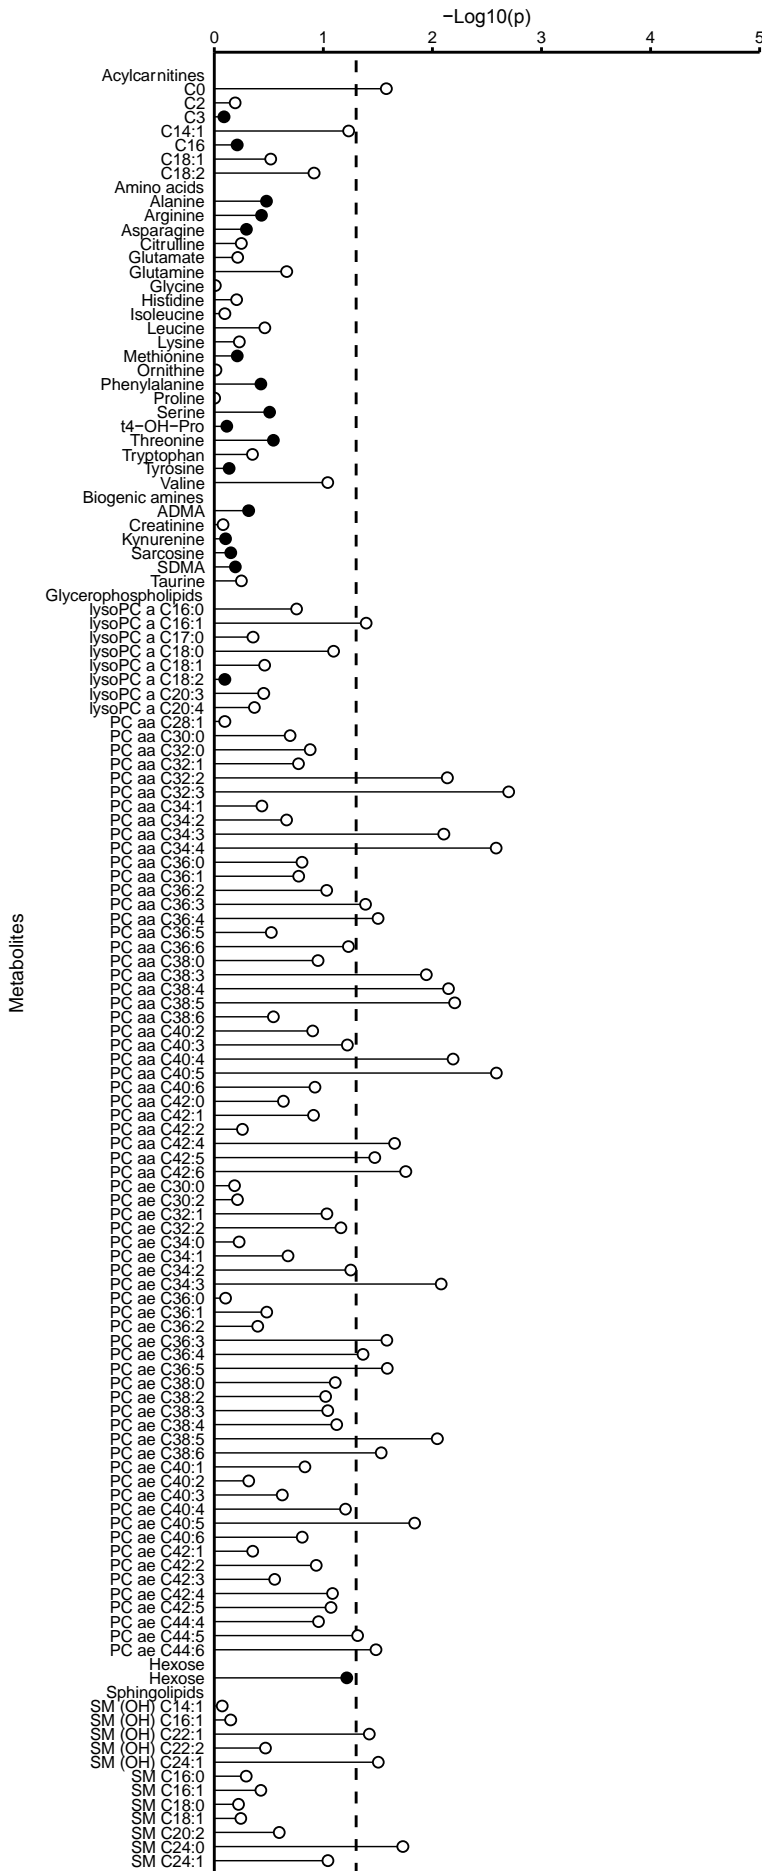

**Figure S3. Statistical significance of the associations between metabolite concentrations and risk of high grade prostate cancer.** High grade prostate cancer was tumours with Gleason score  $\geq 8$  or coded as undifferentiated tumours. The analysis included 124 matched case control sets. Statistical significance was plotted as  $-\log_{10}(p)$ -values. The dashed line represents conventionally statistical significance at  $\alpha = 0.05$ ; no associations were statistical significance after controlling the false discovery rate at  $\alpha = 0.05$  (Benjamini-Hochberg). Filled circles represent positive associations and unfilled circles represent inverse associations. The p-values were derived from a conditional logistic regression using log-metabolite concentration as a continuous variable and adjusting for exact age (continuously), body mass index (fourths; unknown), smoking (never; past; current; unknown), alcohol intake (<10; 10-19; 20-39;  $\geq 40$  g of alcohol per day; unknown), education (primary or none; secondary; degree level; unknown) and marital status (married or cohabiting; not married or cohabiting; unknown).

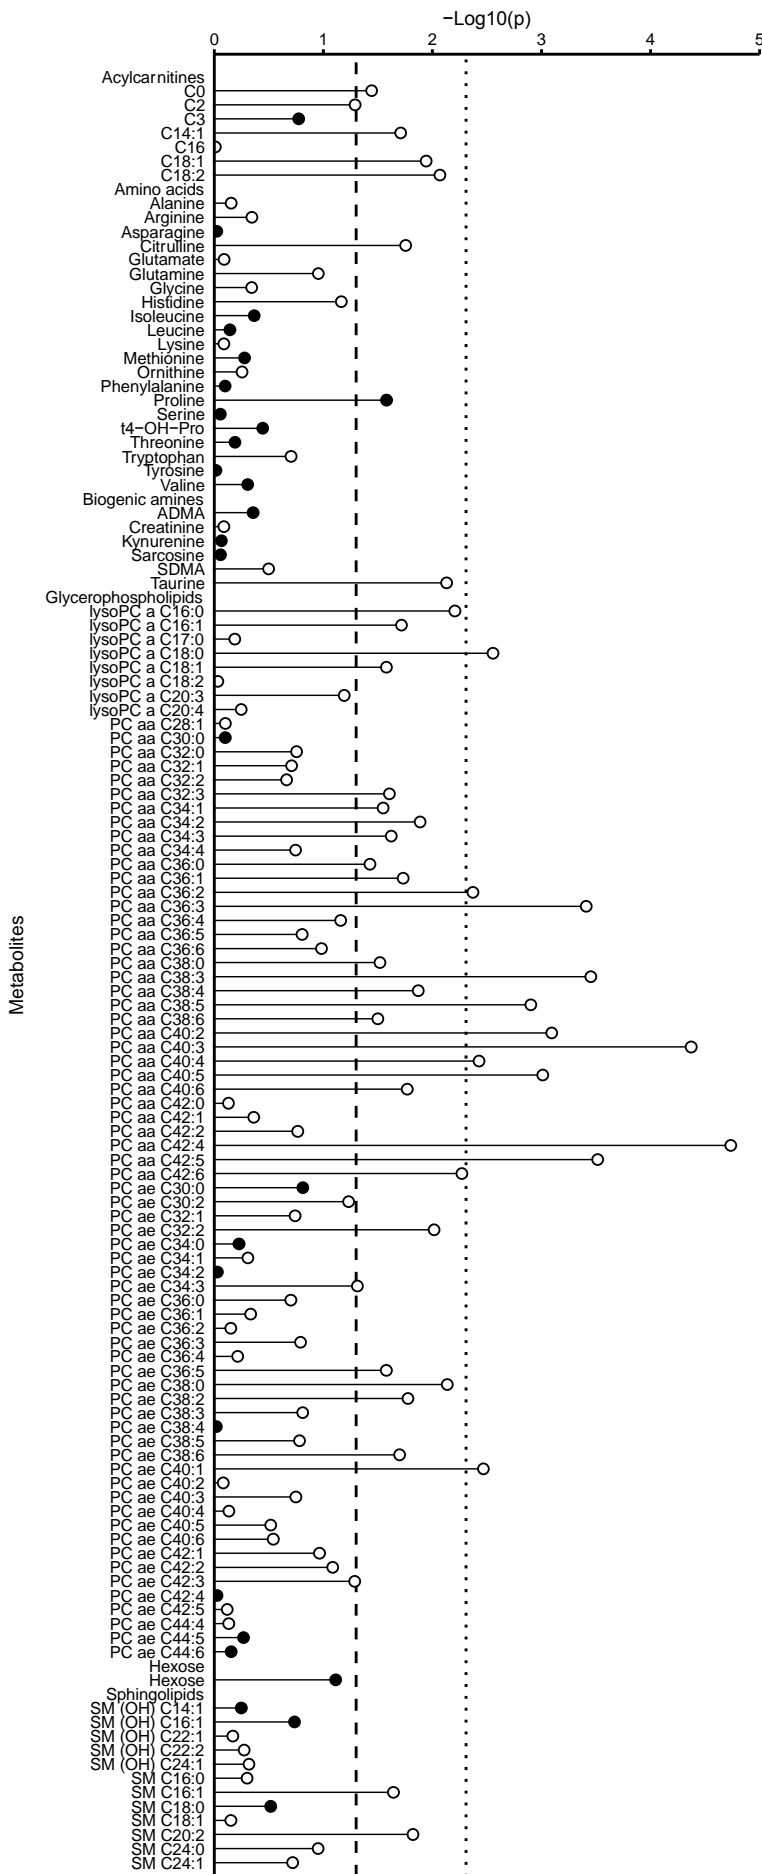

**Figure S4. Statistical significance of associations between metabolite concentrations and risk of advanced stage prostate cancer.** Advanced stage prostate cancer was tumours with TNM score of T<sub>3-4</sub> and/or N<sub>1,3</sub> and/or M<sub>1</sub>, or coded as advanced. The analysis included 208 matched case control sets. Statistical significance was plotted as  $-\log_{10}(p)$ -values). The dashed and the dotted lines represent conventionally statistical significance and statistical significance after allowing for multiple testing using a false discovery rate controlling procedure (Benjamini-Hochberg), respectively, both at  $\alpha = 0.05$ . Filled circles represent positive associations and unfilled circles represent inverse associations. The p-values were derived from a conditional logistic regression using log-metabolite concentration as a continuous variable and adjusting for exact age (continuously), body mass index (fourths; unknown), smoking (never; past; current; unknown), alcohol intake (<10; 10-19; 20-39;  $\geq 40$  g of alcohol per day; unknown), education (primary or none; secondary; degree level; unknown) and marital status (married or cohabiting; not married or cohabiting; unknown).

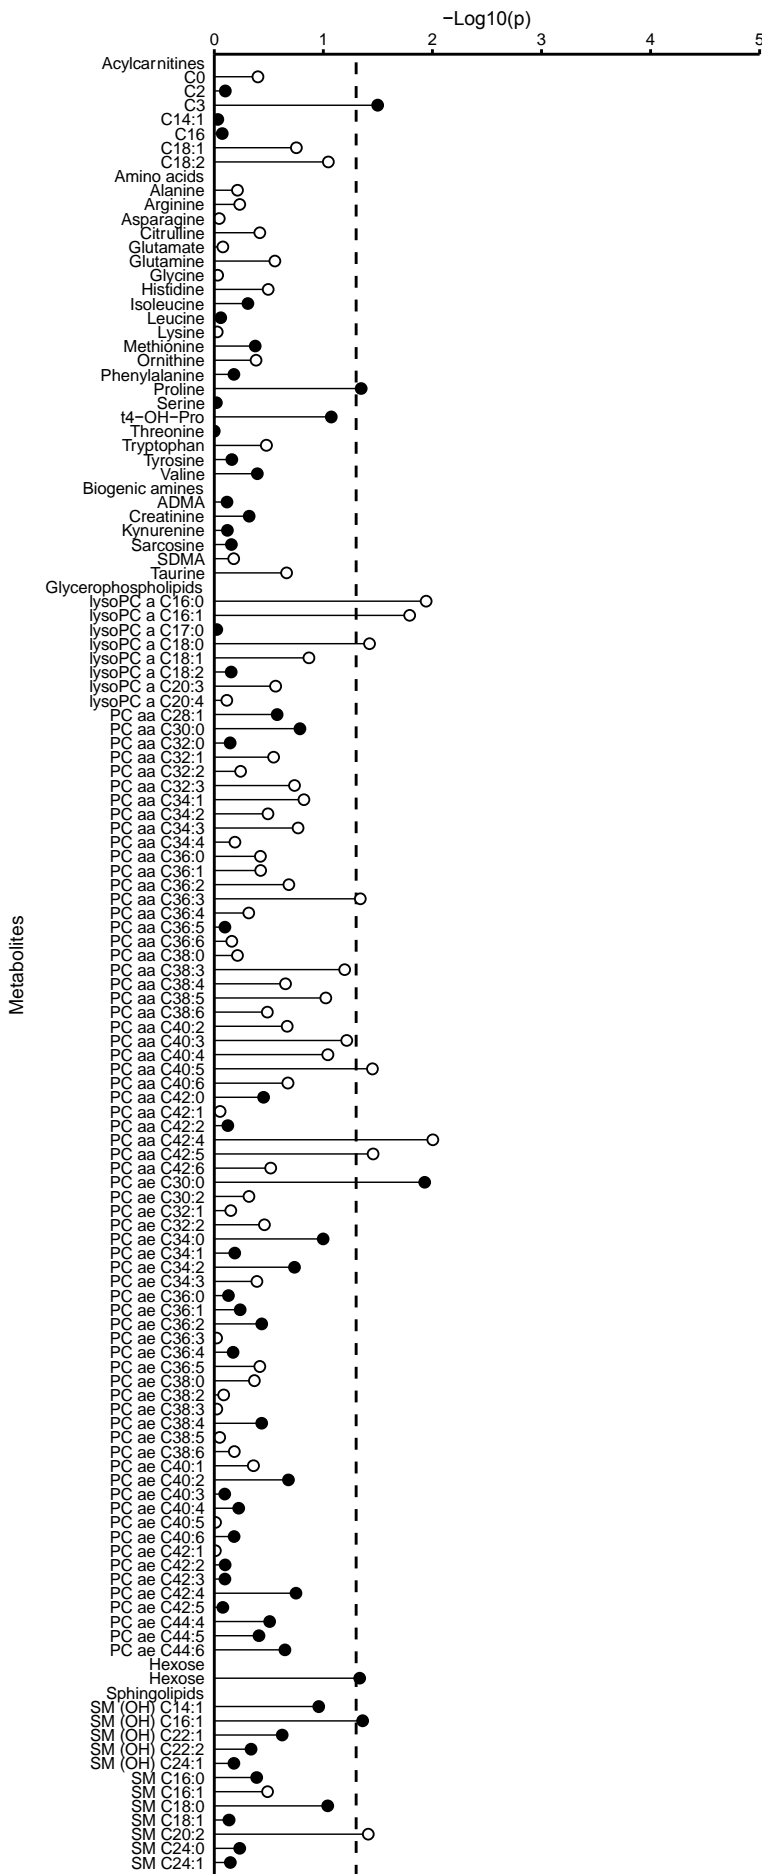

**Figure S5. Statistical significance of the associations between metabolite concentrations and risk of aggressive prostate cancer.** Aggressive prostate cancer was tumours with TNM score of T<sub>4</sub> and/or N<sub>1-3</sub> and/or M<sub>1</sub>. The analysis included 115 matched case control sets. Statistical significance was plotted as  $-\text{log}_{10}(p\text{-values})$ . The dashed line represents conventionally statistical significance at  $\alpha = 0.05$ ; no associations were statistical significance after controlling the false discovery rate at  $\alpha = 0.05$  (Benjamini-Hochberg). Filled circles represent positive associations and unfilled circles represent inverse associations. The p-values were derived from a conditional logistic regression using log-metabolite concentration as a continuous variable and adjusting for exact age (continuously), body mass index (fourths; unknown), smoking (never; past; current; unknown), alcohol intake (<10; 10-19; 20-39;  $\geq 40$  g of alcohol per day; unknown), education (primary or none; secondary; degree level; unknown) and marital status (married or cohabiting; not married or cohabiting; unknown).

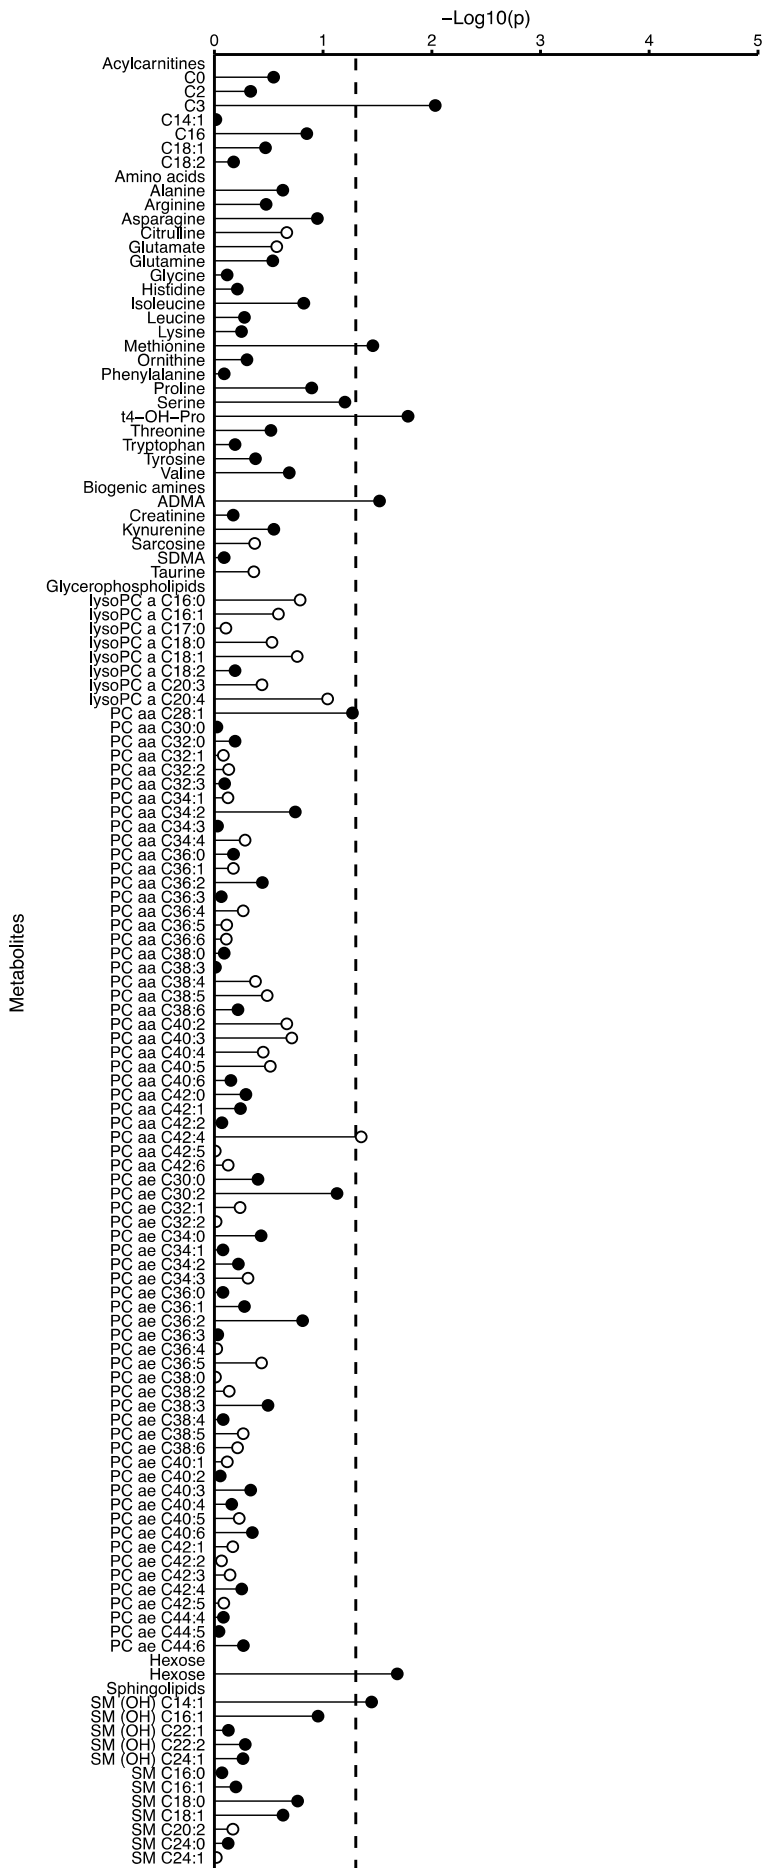

**Figure S6. Statistical significance of associations between metabolite concentrations and risk of death from prostate cancer.** The analysis included 127 matched case control sets. Statistical significance was plotted as  $-\log_{10}(p)$ -values. The dashed line represents conventional statistical significance at  $\alpha = 0.05$ ; no associations were statistical significance after controlling the false discovery rate at  $\alpha = 0.05$  (Benjamini-Hochberg). Filled circles represent positive associations and unfilled circles represent inverse associations. The p-values were derived from a conditional logistic regression using log-metabolite concentration as a continuous variable and adjusting for exact age (continuously), body mass index (fourths; unknown), smoking (never; past; current; unknown), alcohol intake (<10; 10-19; 20-39;  $\geq 40$  g of alcohol per day; unknown), education (primary or none; secondary; degree level; unknown) and marital status (married or cohabiting; not married or cohabiting; unknown).
